# Supplementary material for: Supervised learning and model analysis with compositional data
Source: PubMed Central journal article supplement (PMC10343141; doi:10.1371/journal.pcbi.1011240), 2023-06-30
Supplement: pcbi.1011240.s001.pdf [file pcbi.1011240.s001.pdf]

# S1 Appendix: Details on CFI and CPD

## A Perturbations

Formally, the multiplicative perturbation  $\psi$  and the fixed coordinate perturbation  $\phi$  are defined as follows.

- For all  $j \in \{1, \dots, p\}$ ,  $x \in \mathbb{S}^{p-1}$  with  $x^j \neq 1$  and  $c \in [0, \infty)$ , define

$$\psi_j(x, c) := s_c(x^1, \dots, x^{j-1}, cx^j, x^{j+1}, \dots, x^p) \in \mathbb{S}^{p-1},$$

where  $s_c = 1/(\sum_{\ell \neq j}^p x^\ell + cx^j)$ .

- For all  $j \in \{1, \dots, p\}$ ,  $x \in \mathbb{S}^{p-1}$  with  $\sum_{\ell \neq j}^p x^\ell > 0$  and  $c \in [0, 1]$ , define the intervened composition by

$$\phi_j(x, c) := (sx^1, \dots, sx^{j-1}, c, sx^{j+1}, \dots, sx^p) \in \mathbb{S}^{p-1},$$

where  $s = (1 - c)/(\sum_{\ell \neq j}^p x^\ell)$ .

## B Estimators

We propose to estimate CFI and CPD with the following two estimators.

- For i.i.d. observations  $X_1, \dots, X_n$  and a differentiable function  $f : \mathbb{S}^{p-1} \rightarrow \mathbb{R}$ , we estimate the CFI for all  $j \in \{1, \dots, p\}$  as

$$\hat{I}_f^j = \frac{1}{n} \sum_{i=1}^n \frac{d}{dc} f(\psi(X_i, c)) \Big|_{c=1}.$$

- For i.i.d. observations  $X_1, \dots, X_n$  and a function  $f : \mathbb{S}^{p-1} \rightarrow \mathbb{R}$ , we estimate the CPD for all  $j \in \{1, \dots, p\}$  and  $z \in [0, 1]$  as

$$\hat{S}_f^j(z) = \frac{1}{n} \sum_{i=1}^n f(\phi(X_i, z)) - \frac{1}{n} \sum_{i=1}^n f(X_i).$$
