# Supplementary material for: Supervised learning and model analysis with compositional data
Source: PubMed Central journal article supplement (PMC10343141; doi:10.1371/journal.pcbi.1011240), 2023-06-30
Supplement: pcbi.1011240.s003.pdf [file pcbi.1011240.s003.pdf]

## S3 Appendix: Details and additional results for experiments

### A List of datasets

| Dataset           | Reference | Prediction tasks                                   | Dim<br>( $n \times d$ ) | Additional preprocessing                      |
|-------------------|-----------|----------------------------------------------------|-------------------------|-----------------------------------------------|
| rmp               | [1]       | classification:<br>- Crohn's disease vs healthy    | $95 \times 351$         | none                                          |
| camp              | [2]       | classification:<br>- parasite infected vs healthy  | $270 \times 622$        | none                                          |
| cirrhosis         | [3]       | classification:<br>- cirrhosis vs healthy          | $130 \times 444$        | aggregated to species & prev./abun. filtering |
| cancer            | [4]       | classification:<br>- cancer vs non-cancer          | $490 \times 335$        | none                                          |
| impaired-diabetes | [5]       | classification:<br>- impaired vs type 2 diabetes   | $101 \times 3758$       | none                                          |
| nugent-category   | [6]       | classification:<br>- nugent score high vs low      | $342 \times 305$        | none                                          |
| gastro-oral       | [7]       | classification:<br>- gastrointestinal vs oral      | $2070 \times 1218$      | none                                          |
| healthy-cd        | [8]       | classification:<br>- healthy vs Crohn's disease    | $74 \times 367$         | none                                          |
| kostic            | [9]       | classification:<br>- healthy vs tumor              | $172 \times 409$        | none                                          |
| malawi-venezuela  | [10]      | classification:<br>- Malawi vs Venezuela           | $54 \times 1544$        | none                                          |
| black-hispanic    | [6]       | classification:<br>- black vs Hispanic             | $199 \times 305$        | none                                          |
| ss-paired         | [7]       | classification:<br>- sub vs supragingival plaque   | $408 \times 1218$       | none                                          |
| usa-malawi        | [10]      | classification:<br>- US vs Malawi                  | $150 \times 1544$       | none                                          |
| st-paired         | [7]       | classification:<br>- stool vs tongue dorsum        | $404 \times 1218$       | none                                          |
| gevers_ileum      | [11]      | classification:<br>- Crohn's disease vs healthy    | $140 \times 446$        | none                                          |
| yatsunenko_sex    | [10]      | classification:<br>male vs female                  | $129 \times 1544$       | none                                          |
| normal-diabetes   | [5]       | classification:<br>- normal vs type 2 diabetes     | $96 \times 3758$        | none                                          |
| healthy-uc        | [8]       | classification:<br>- healthy vs Ulcerative colitis | $59 \times 367$         | none                                          |

|                 |      |                                                 |                   |                                                |
|-----------------|------|-------------------------------------------------|-------------------|------------------------------------------------|
| hmp_sex         | [7]  | classification:<br>- female vs male             | $180 \times 1218$ | none                                           |
| qin2012         | [12] | classification:<br>- healthy vs type 2 diabetes | $124 \times 2526$ | none                                           |
| turnbaugh       | [13] | classification:<br>- lean vs obese              | $142 \times 232$  | none                                           |
| gevers_rectum   | [11] | classification:<br>- Crohn’s disease vs health  | $160 \times 446$  | none                                           |
| qin2014         | [3]  | classification:<br>- cirrhosis vs healthy       | $130 \times 2579$ | none                                           |
| white-black     | [6]  | classification:<br>- white vs black             | $200 \times 305$  | none                                           |
| centralparksoil | [14] | regression:<br>- ph level of soil               | $580 \times 1498$ | prev./abun.<br>filtering                       |
| uk              | [15] | regression:<br>- BMI                            | $882 \times 327$  | UK subpopulation<br>& prev./abun.<br>filtering |
| hiv             | [16] | regression:<br>- CD4+ cell counts               | $152 \times 282$  | none                                           |
| tara            | [17] | regression:<br>- ocean salinity                 | $136 \times 2407$ | prev./abun.<br>filtering                       |
| ravel_ph        | [6]  | regression:<br>- vaginal pH                     | $388 \times 305$  | none                                           |
| pcdai-rectum    | [11] | regression:<br>- PCDAI scores                   | $51 \times 446$   | none                                           |
| pcdai-ileum     | [11] | regression:<br>- PCDAI scores                   | $67 \times 446$   | none                                           |
| baby-age        | [10] | regression:<br>- infant age                     | $49 \times 1544$  | none                                           |
| nugent-score    | [6]  | regression:<br>- nugent score                   | $388 \times 305$  | none                                           |

---

**Table A.** List of microbiome datasets used to benchmark `KernelBiome`. The cirrhosis dataset is a processed version of qin2014. Whenever prevalence/abundance filtering (prev./abun. filtering) is applied it means that only taxa that appear in 25% of the samples and with a median non-zero count of 5. Datasets other than the following ones are taken from the MLRepo [18] are taken directly without further processing: uk, camp, centralparksoil, cirrosis, cancer, hiv, rmp, tara.

## B Weighting matrix for weighted KernelBiome

The weight matrix  $W^{\text{UniFrac}}$  for the cirrhosis dataset [3] and the centralparksoil dataset [14] are presented as heatmaps in Fig A. Using our proposed weighted kernels (see Section 2 of S7 Appendix) with the UniFrac-based weight matrix  $W^{\text{UniFrac}}$  is different from incorporating the UniFrac-distance via kernel convolution as proposed by [19].

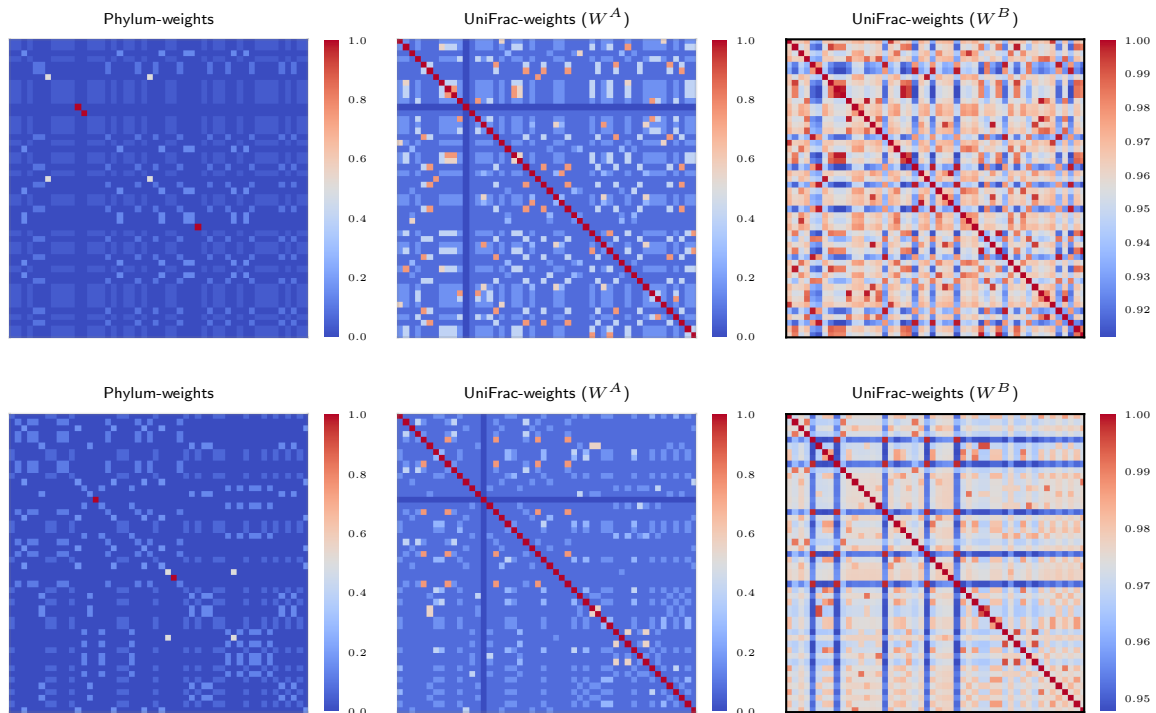

**Fig A.** Visualization of the phylum-weights and the two UniFrac-weights  $W^A = DM^A D$  for  $W^B = DM^B D$ , based on the 50 pre-screened species (see S3 Appendix). Upper panel: cirrhosis dataset. Lower panel: centralparksoil dataset.

## C Detailed experiment results on public datasets

### C.1 Prediction performance

Here we provide more details on the the prediction performance evaluation. Boxplots of prediction scores for all 33 datasets as in Fig 3 in the main text are given in Fig B, and PR curves accompanying the boxplots can be found in Fig C. We can see that `KernelBiome` achieves the best results for most of the tasks. For classification tasks, `KernelBiome` performs competitively both in terms of balanced accuracy and PR curves. (For `SVM-RBF`, `KB-Aitchison` and `KernelBiome`, the PR curves are based on the estimated probabilities computed in the `sklearn`-package. We observed a slight mismatch between these predicted probabilities and predicted classes in some of the examples, which is due to a bug <https://github.com/scikit-learn/scikit-learn/issues/13211>. We therefore recommend putting more emphasis on the accuracy plots.) The frequency of kernels selected the most often by `KernelBiome` is given in Table. B.

| Dataset (short name) | Kernel         | Frequency (%) |
|----------------------|----------------|---------------|
| rmp                  | aitchison      | 59.5          |
| camp                 | aitchison-rbf  | 44.5          |
| cirrhosis            | aitchison-rbf  | 65.5          |
| cancer               | aitchison      | 73.5          |
| impaired-diabetes    | aitchison      | 54.0          |
| nugent-category      | aitchison-rbf  | 63.0          |
| gastro-oral          | aitchison      | 100.0         |
| healthy-cd           | aitchison-rbf  | 46.0          |
| kostic               | aitchison-rbf  | 55.5          |
| malawi-venezuela     | aitchison      | 100.0         |
| black-hispanic       | aitchison      | 55.5          |
| ss-paired            | aitchison-rbf  | 78.5          |
| usa-malawi           | aitchison      | 100.0         |
| st-paired            | aitchison      | 100.0         |
| gevers_ileum         | generalized-js | 29.5          |
| yatsunenکو_sex       | aitchison-rbf  | 70.5          |
| normal-diabetes      | aitchison-rbf  | 48.0          |
| healthy-uc           | aitchison-rbf  | 48.5          |
| hmp_sex              | aitchison-rbf  | 35.5          |
| qin2012              | aitchison      | 53.0          |
| turnbaugh            | aitchison      | 56.5          |
| gevers_rectum        | aitchison-rbf  | 53.5          |
| qin2014              | aitchison-rbf  | 81.5          |
| white-black          | aitchison      | 50.0          |
| centralparksoil      | generalized-js | 45.0          |
| uk                   | aitchison-rbf  | 100.0         |
| hiv                  | aitchison-rbf  | 97.0          |
| tara                 | aitchison-rbf  | 93.0          |
| ravel_ph             | heat-diffusion | 61.0          |
| pcdai-rectum         | rbf            | 67.0          |
| pcdai-ileum          | rbf            | 40.0          |
| baby-age             | aitchison      | 91.0          |
| nugent-score         | aitchison-rbf  | 99.5          |

**Table B.** Kernels selected most frequently by KernelBiome for all 33 datasets.

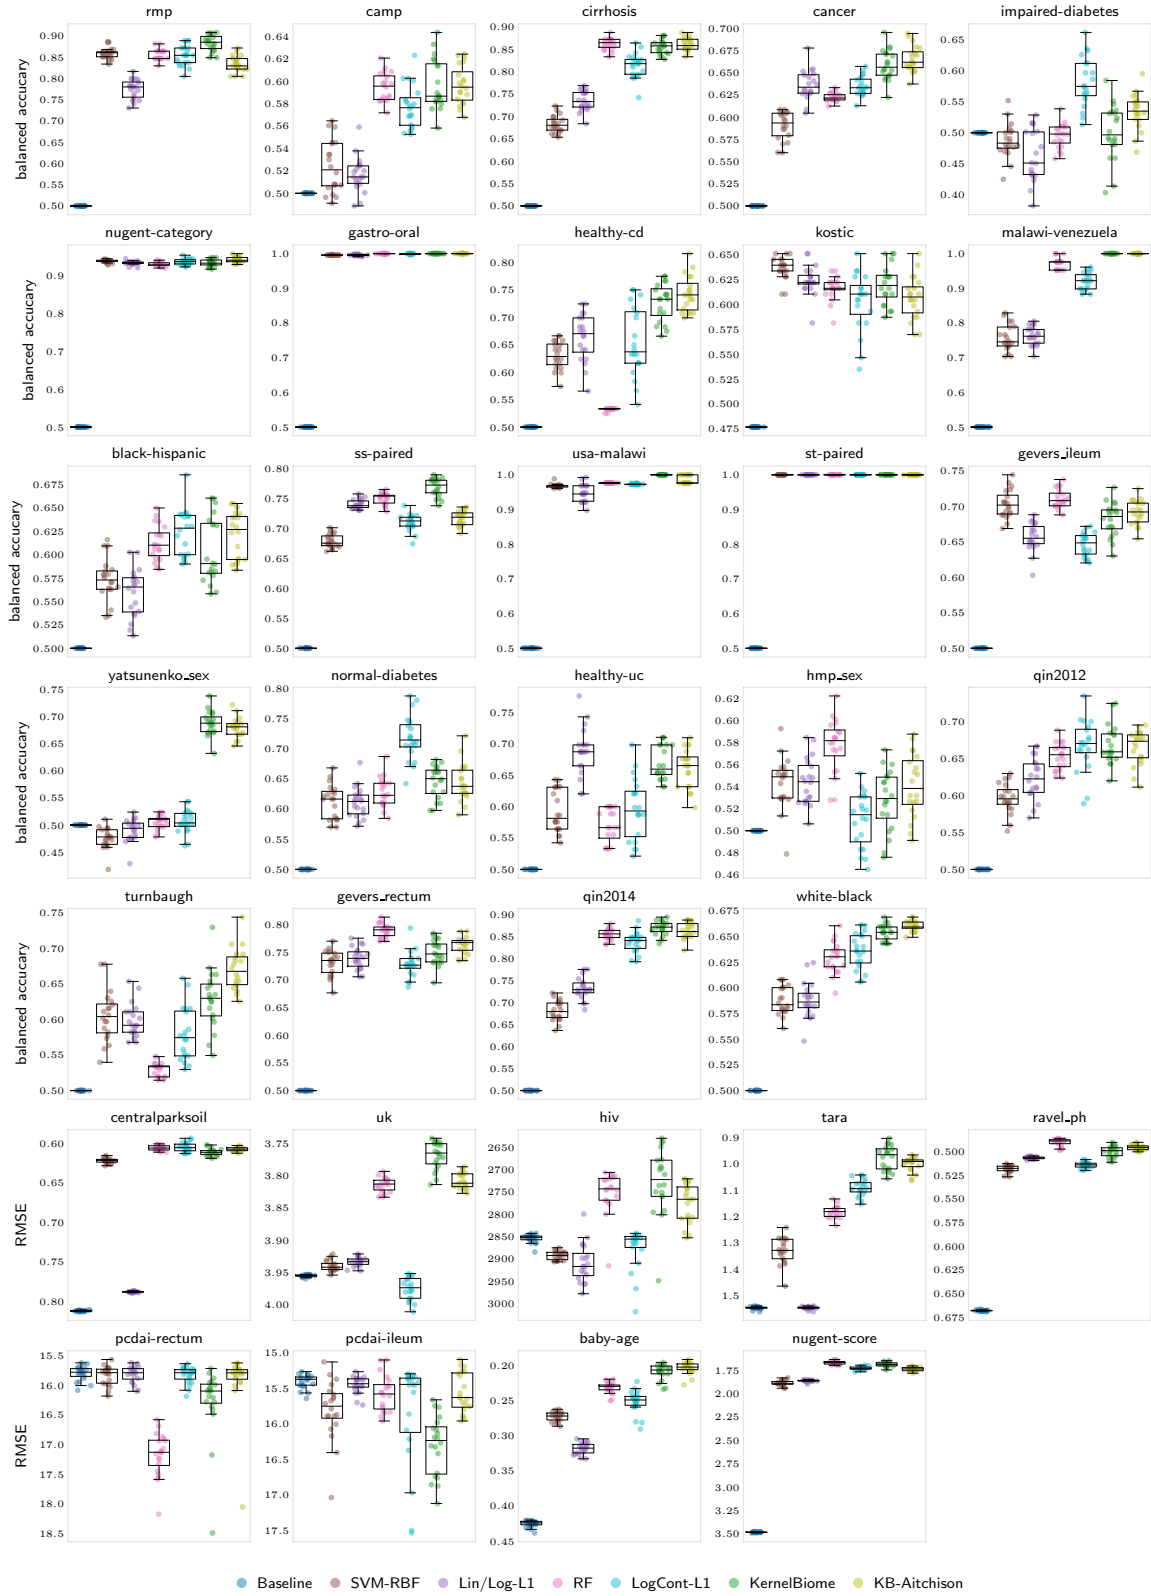

**Fig B.** Comparison of predictive performance on the 33 public datasets based on a 10-fold train/test split.

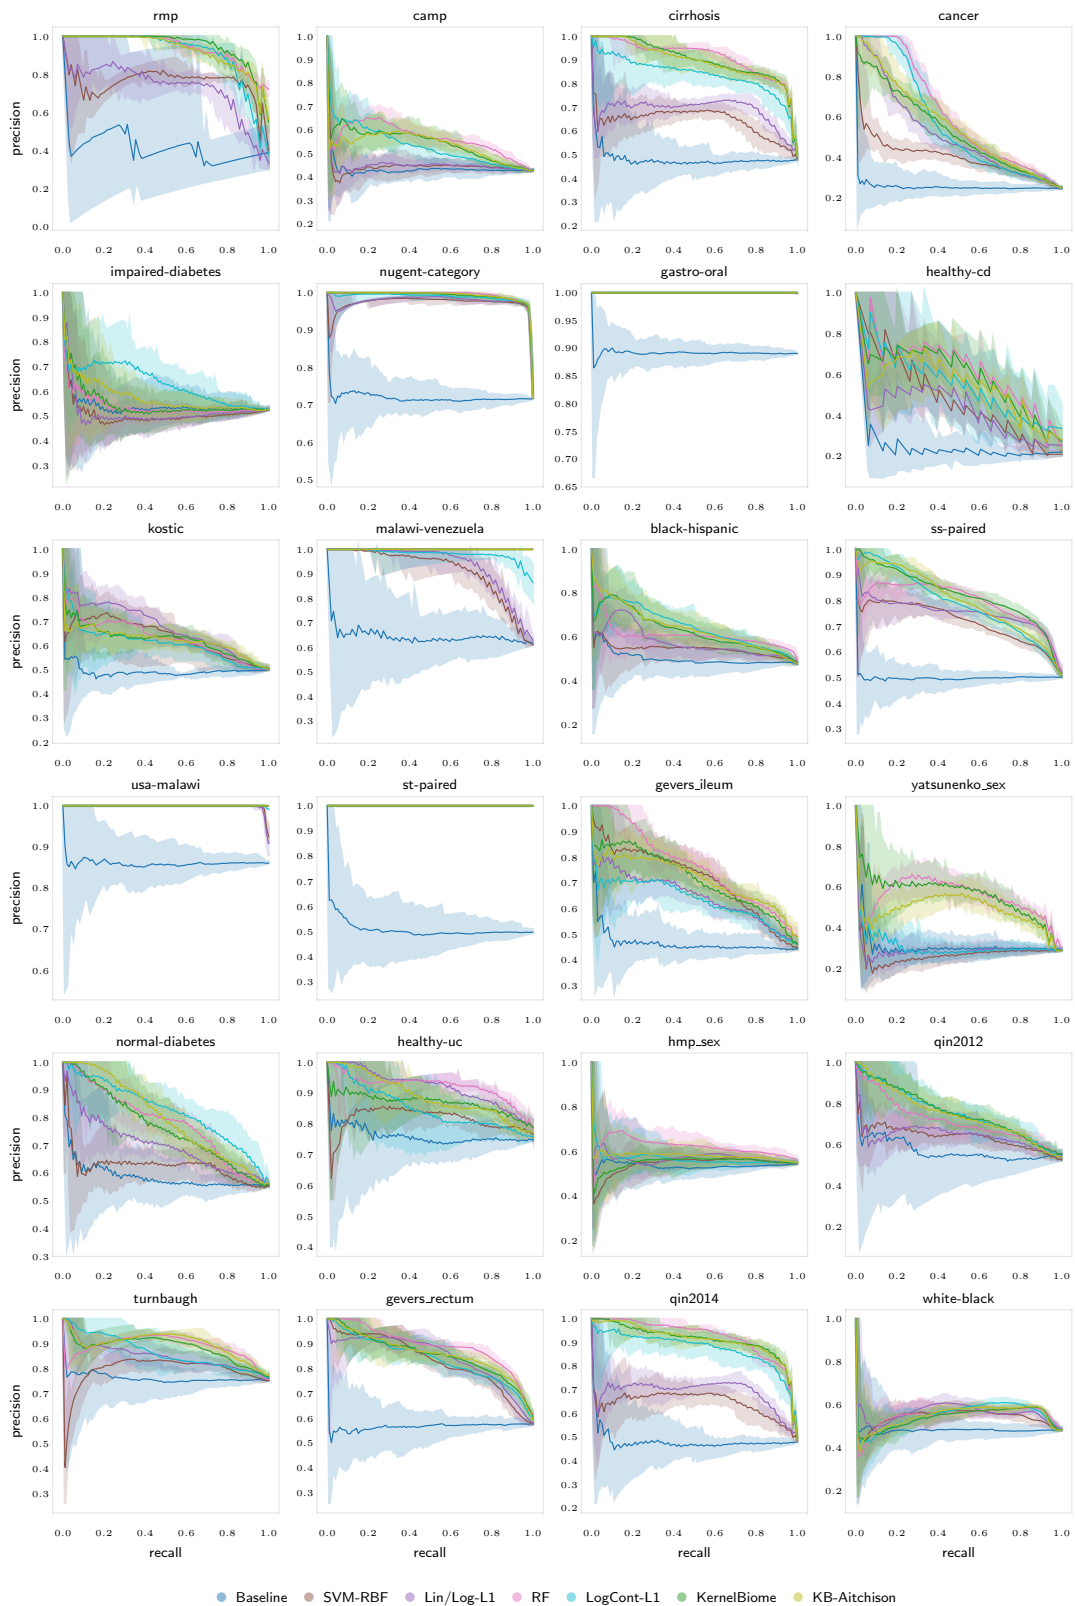

**Fig C.** PR curves for the 24 classification datasets. The solid curve is the average curve from the 20 random 10-fold CV, and the shaded area is the 95% confidence band.

## C.2 Model analysis

Here we include the remaining model analysis results for the cirrhosis and centralparksoil datasets. As in the main paper, we screened both data sets to only include the 50 taxa with the highest absolute CFIs by `KernelBiome` with Aitchison kernel. Kernel PCA plots for the cirrhosis dataset is given in Fig D and the CFI values for the centralparksoil dataset are given in Fig E.

Furthermore, we also provide the missing circle plots here. The extended version of Fig 5C in the main text with long labels is given in Fig F. Fig G is the circle plot for the cirrhosis dataset based on the generalized-JS kernel. Fig H is the circle plot for the centralparksoil dataset based on the Aitchison kernel.

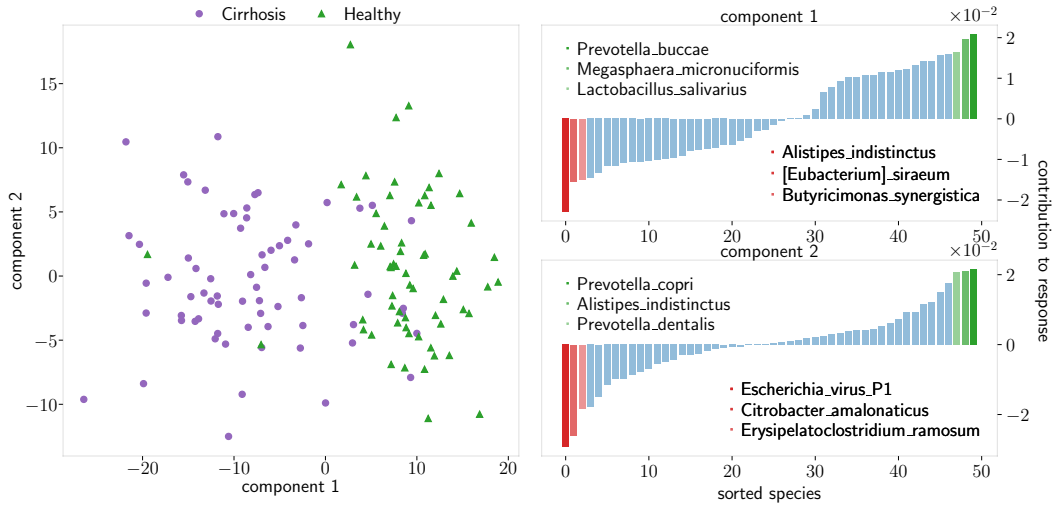

**Fig D.** Kernel PCA plot and contributions of the 50 taxa to component 1 and 2 sorted from the most negative contribution to the most positive contribution (cirrohsis).

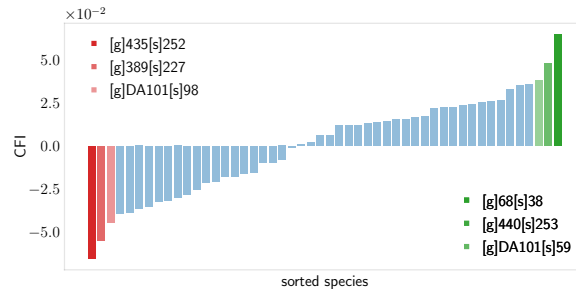

**Fig E.** CFI values for the 50 taxa sorted from the most negative contribution to the most positive contribution to the response (centralparksoil).

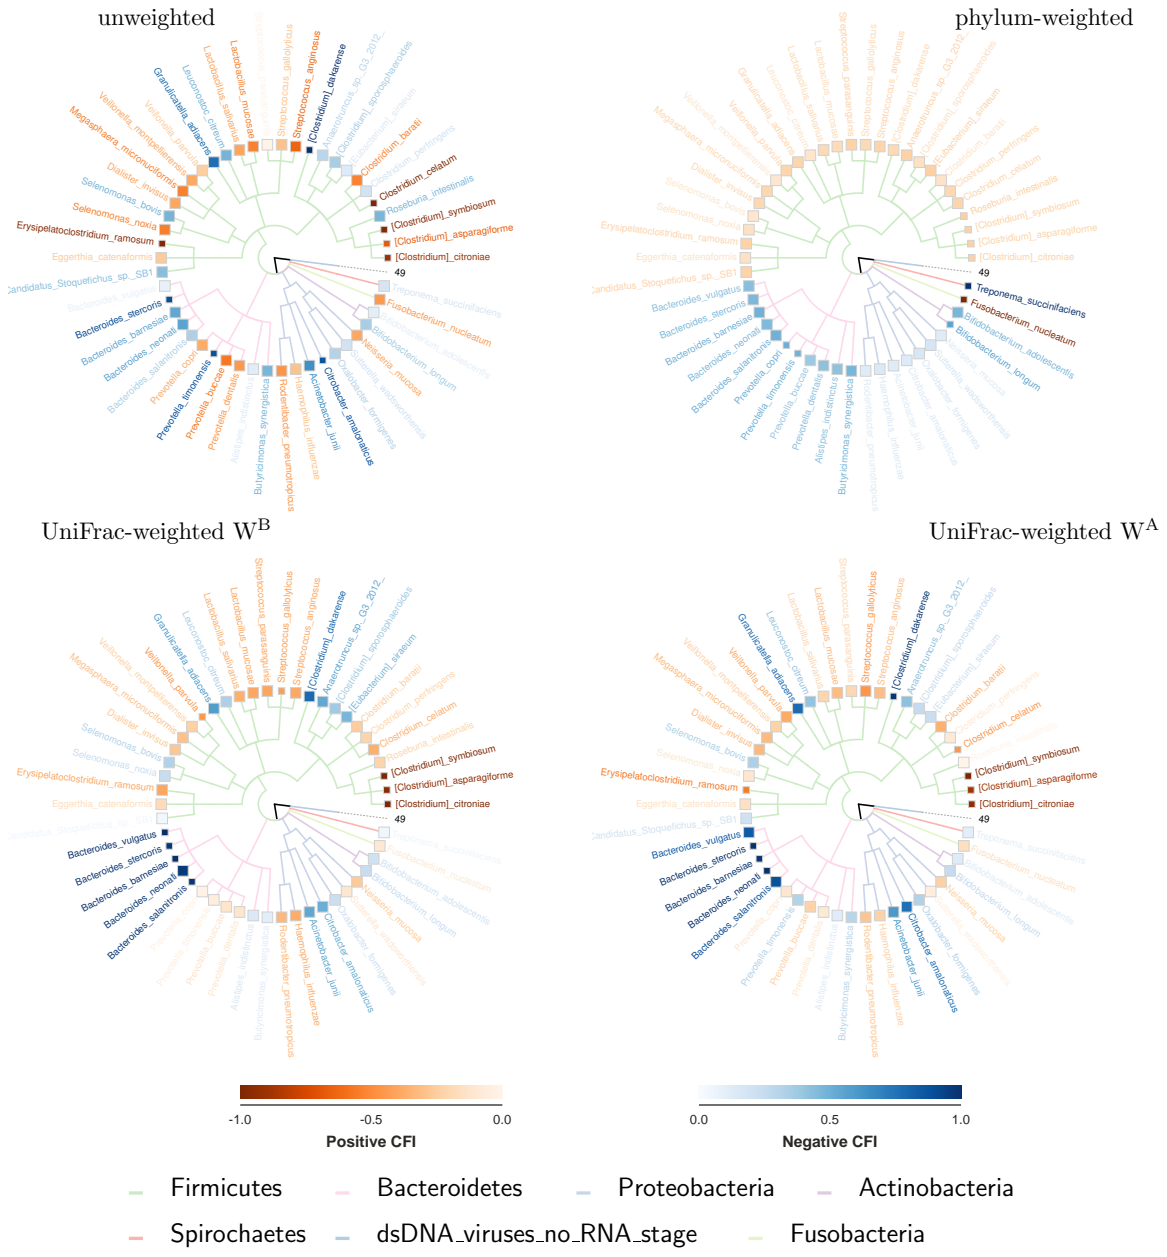

**Fig F.** Scaled CFI values for cirrhosis dataset where a darker color shade of the name of the microbiota signifies a stronger (positive resp. negative) feature influence (Aitchison Kernel).



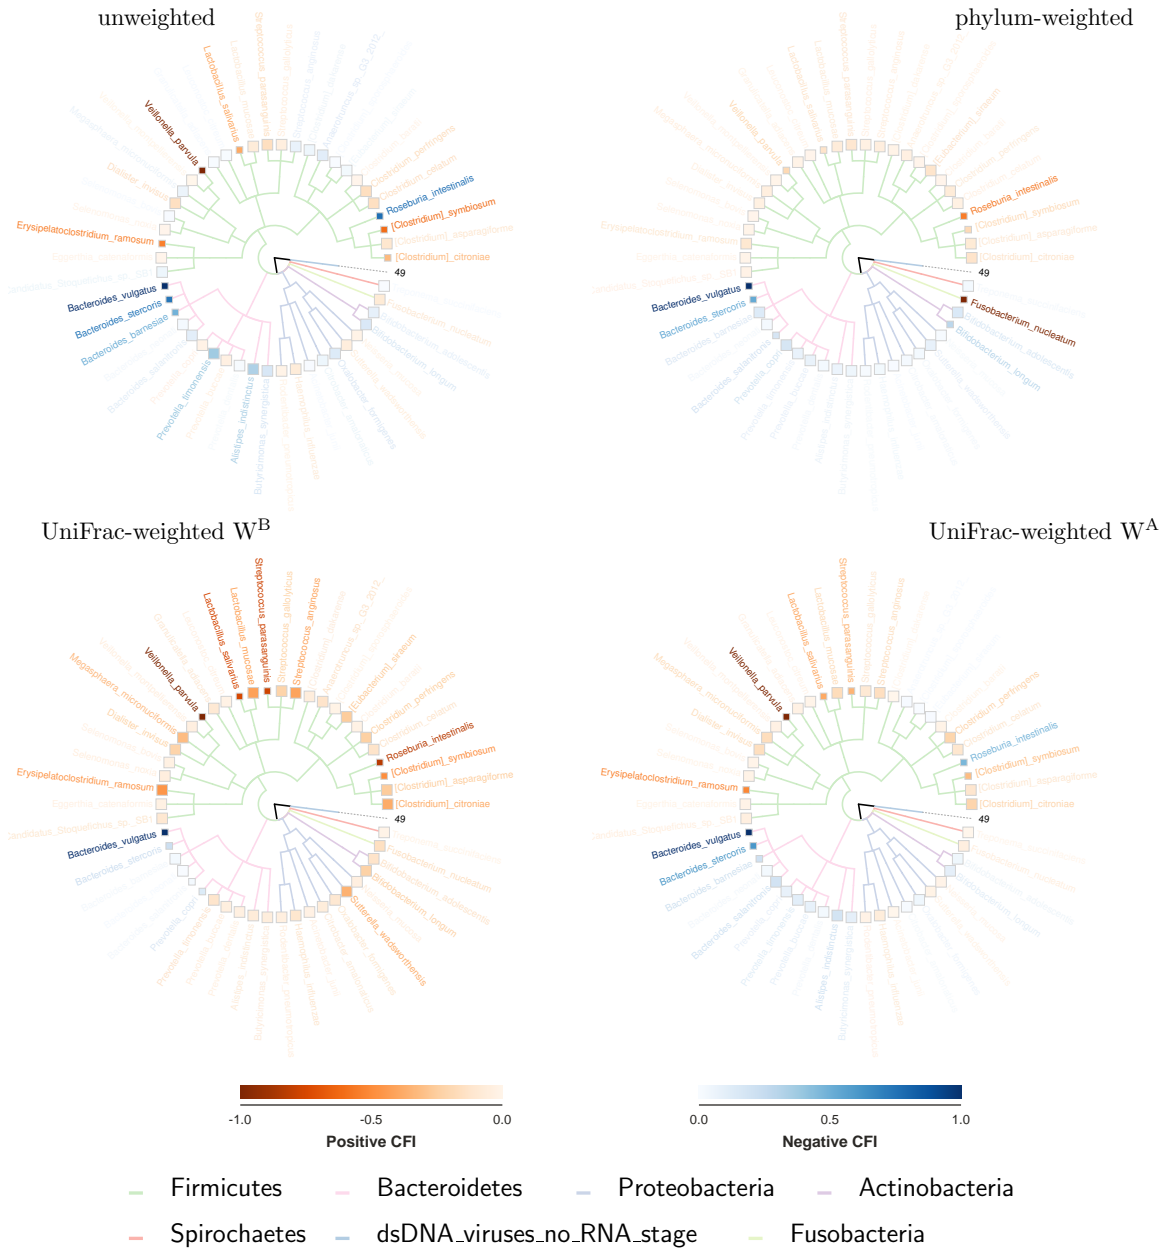

**Fig G.** Scaled CFI values for cirrhosis dataset where a darker color shade of the name of the microbiota signifies a stronger (positive resp. negative) feature influence (Generalized JS Kernel).

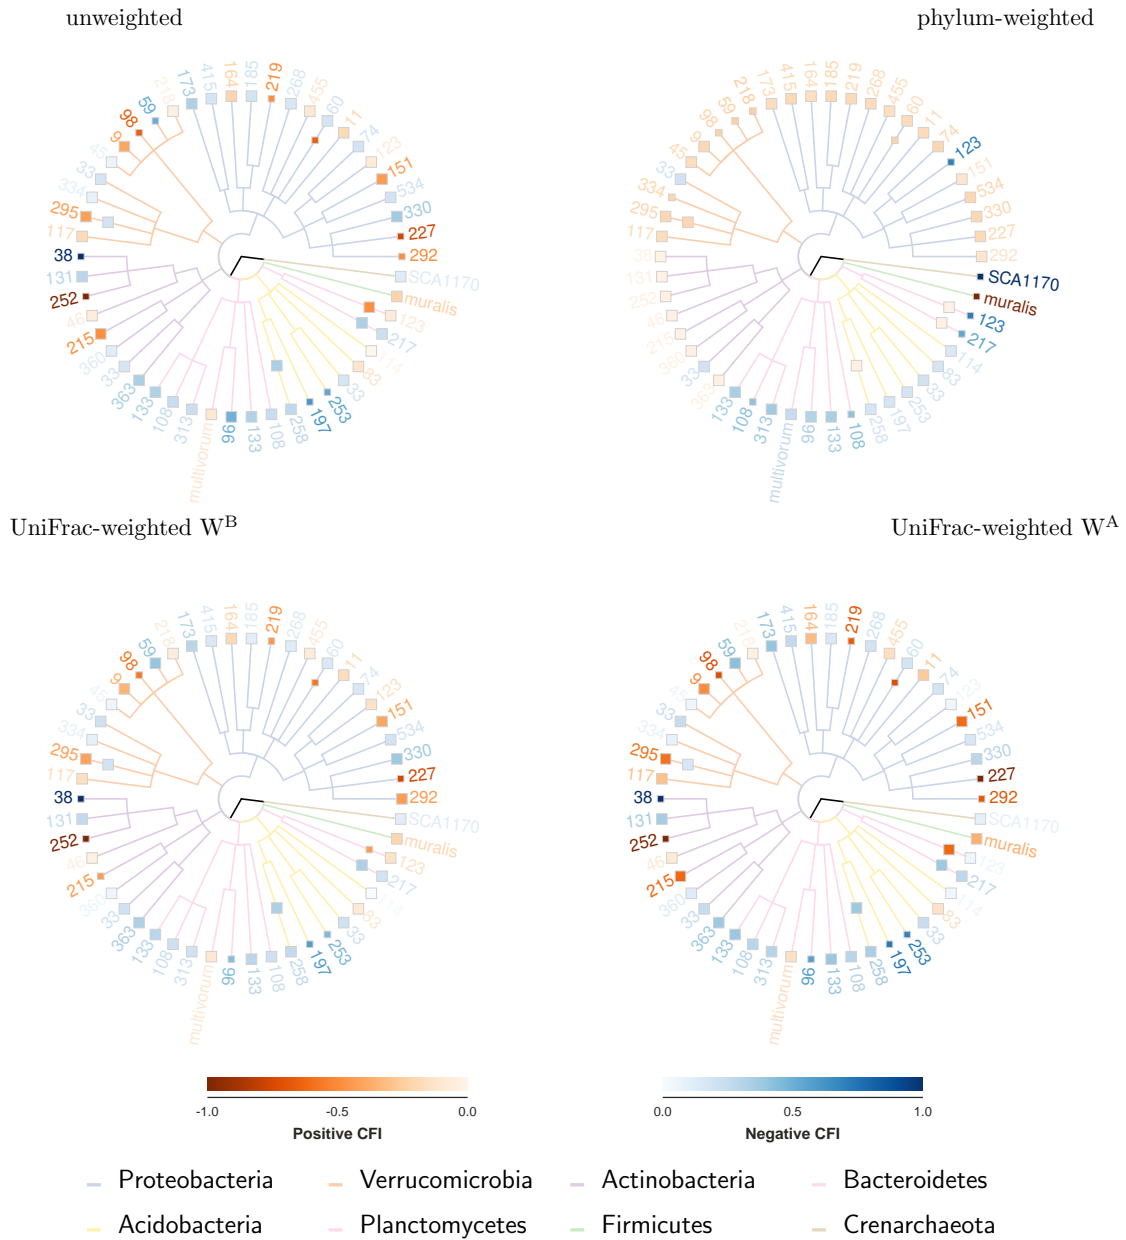

**Fig H.** Scaled CFI values for centralparksoil dataset where a darker color shade of the name of the microbiota signifies a stronger (positive resp. negative) feature influence (Aitchison Kernel).

## References

1. Vandeputte D, Kathagen G, D'hoë K, Vieira-Silva S, Valles-Colomer M, Sabino J, et al. Quantitative microbiome profiling links gut community variation to microbial load. *Nature*. 2017;551(7681):507–511.
2. Berry AS, Johnson K, Martins R, Sullivan MC, Farias Amorim C, Putre A, et al. Natural infection with *Giardia* is associated with altered community structure of the human and canine gut microbiome. *MSphere*. 2020;5(4):e00670–20.
3. Qin N, Yang F, Li A, Prifti E, Chen Y, Shao L, et al. Alterations of the human gut microbiome in liver cirrhosis. *Nature*. 2014;513(7516):59–64.
4. Baxter NT, Ruffin MT, Rogers MA, Schloss PD. Microbiota-based model improves the sensitivity of fecal immunochemical test for detecting colonic lesions. *Genome medicine*. 2016;8(1):1–10.
5. Karlsson FH, Tremaroli V, Nookaew I, Bergström G, Behre CJ, Fagerberg B, et al. Gut metagenome in European women with normal, impaired and diabetic glucose control. *Nature*. 2013;498(7452):99–103.
6. Ravel J, Gajer P, Abdo Z, Schneider GM, Koenig SS, McCulle SL, et al. Vaginal microbiome of reproductive-age women. *Proceedings of the National Academy of Sciences*. 2011;108(supplement\_1):4680–4687.
7. Human Microbiome Project Consortium. Structure, function and diversity of the healthy human microbiome. *nature*. 2012;486(7402):207–214.
8. Morgan XC, Tickle TL, Sokol H, Gevers D, Devaney KL, Ward DV, et al. Dysfunction of the intestinal microbiome in inflammatory bowel disease and treatment. *Genome biology*. 2012;13(9):1–18.
9. Kostic AD, Gevers D, Pedamallu CS, Michaud M, Duke F, Earl AM, et al. Genomic analysis identifies association of *Fusobacterium* with colorectal carcinoma. *Genome research*. 2012;22(2):292–298.

10. Yatsunenکو T, Rey FE, Manary MJ, Trehan I, Dominguez-Bello MG, Contreras M, et al. Human gut microbiome viewed across age and geography. *nature*. 2012;486(7402):222–227.
11. Gevers D, Kugathasan S, Denson LA, Vázquez-Baeza Y, Van Treuren W, Ren B, et al. The treatment-naive microbiome in new-onset Crohn’s disease. *Cell host & microbe*. 2014;15(3):382–392.
12. Qin J, Li Y, Cai Z, Li S, Zhu J, Zhang F, et al. A metagenome-wide association study of gut microbiota in type 2 diabetes. *Nature*. 2012;490(7418):55–60.
13. Turnbaugh PJ, Ley RE, Hamady M, Fraser-Liggett CM, Knight R, Gordon JI. The human microbiome project. *Nature*. 2007;449(7164):804–810.
14. Ramirez KS, Leff JW, Barberán A, Bates ST, Betley J, Crowther TW, et al. Biogeographic patterns in below-ground diversity in New York City’s Central Park are similar to those observed globally. *Proceedings of the Royal Society B: Biological Sciences*. 2014;281(1795):20141988.
15. McDonald D, Hyde E, Debelius JW, Morton JT, Gonzalez A, Ackermann G, et al. American gut: an open platform for citizen science microbiome research. *Msystems*. 2018;3(3):e00031–18.
16. Rivera-Pinto J, Egozcue JJ, Pawlowsky-Glahn V, Paredes R, Noguera-Julian M, Calle ML. Balances: a new perspective for microbiome analysis. *MSystems*. 2018;3(4):e00053–18.
17. Sunagawa S, Acinas SG, Bork P, Bowler C, Eveillard D, Gorsky G, et al. Tara Oceans: towards global ocean ecosystems biology. *Nature Reviews Microbiology*. 2020;18(8):428–445.
18. Vangay P, Hillmann BM, Knights D. Microbiome Learning Repo (ML Repo): A public repository of microbiome regression and classification tasks. *Gigascience*. 2019;8(5):giz042.

19. Zhao N, Chen J, Carroll IM, Ringel-Kulka T, Epstein MP, Zhou H, et al. Testing in microbiome-profiling studies with MiRKAT, the microbiome regression-based kernel association test. *The American Journal of Human Genetics*. 2015;96(5):797–807.
