# Supplementary material for: Supervised learning and model analysis with compositional data
Source: PubMed Central journal article supplement (PMC10343141; doi:10.1371/journal.pcbi.1011240), 2023-06-30
Supplement: pcbi.1011240.s006.pdf [file pcbi.1011240.s006.pdf]

## S6 Appendix: Proofs

### A Proof of Proposition 2.1

*Proof.* We start with the CFI. Fix  $j \in \{1, \dots, p\}$  and  $x \in \mathbb{S}^{p-1}$ , then we can compute the derivative using the chain rule and the explicit form of the perturbation  $\psi$  as follows

$$\begin{aligned}
 \frac{d}{dc}f(\psi_j(x, c)) &= \left\langle \nabla f(\psi_j(x, c)), \frac{d}{dc}\psi_j(x, c) \right\rangle \\
 &= \left\langle \nabla f(\psi_j(x, c)), \frac{d}{dc}s_c(x^1, \dots, x^{j-1}, cx^j, x^{j+1}, \dots, x^p)^\top \right\rangle \\
 &= \left\langle \nabla f(\psi_j(x, c)), \frac{d}{dc} \frac{1}{\sum_{\ell \neq j} x^\ell + cx^j} (x^1, \dots, x^{j-1}, cx^j, x^{j+1}, \dots, x^p)^\top \right\rangle \\
 &= \left\langle \nabla f(\psi_j(x, c)), \right. \\
 &\quad \left. \frac{-x^j}{(\sum_{\ell \neq j} x^\ell + cx^j)^2} \left( x^1, \dots, x^{j-1}, cx^j x^j - x^j (\sum_{\ell \neq j} x^\ell + cx^j), x^{j+1}, \dots, x^p \right)^\top \right\rangle.
 \end{aligned}$$

Evaluating, the derivative at  $c = 1$  leads to

$$\frac{d}{dc}f(\psi_j(x, c))|_{c=1} = \langle \nabla f(x), x^j(e_j - x) \rangle, \tag{A}$$

where we used that  $\psi_j(x, 1) = x$ . Moreover, the gradient of  $f$  in the case of the log-contrast model is given by

$$\nabla f(x) = \left( \frac{\beta_1}{x^1}, \dots, \frac{\beta_p}{x^p} \right)^\top. \tag{B}$$

Combining (A) and (B) together with the constraint  $\sum_{k=1}^p \beta_k = 0$  implies that

$$\frac{d}{dc}f(\psi_j(x, c))|_{c=1} = -x^j \sum_{k \neq j} \beta_k + \beta^j (1 - x^j) = \beta_j.$$

Hence, taking the expectation leads to

$$I_j^j = \mathbb{E}[\frac{d}{dc}f(\psi_j(X, c))|_{c=1}] = \beta_j,$$

which proves the first part of the proposition.

Next, we show the result for the CPD. Fix  $j \in \{1, \dots, p\}$  and  $z \in [0, 1]$ . Then  $S_f^j(z)$  for the log-contrast model can be computed as follows

$$\begin{aligned}
S_f^j(z) &= \mathbb{E}[f(\phi_j(X, z))] - \mathbb{E}[f(X)] \\
&= \sum_{\ell=1}^p \beta_\ell \mathbb{E}[\log(\phi_j(X, z)^\ell)] - \mathbb{E}[f(X)] \\
&= \sum_{\ell \neq j}^p \beta_\ell \mathbb{E}[\log(sX^\ell)] + \beta_j \log(z) - \mathbb{E}[f(X)] \\
&= \beta_j \log(z) + \sum_{\ell \neq j}^p \beta_\ell \mathbb{E}[\log(s)] + \sum_{\ell \neq j}^p \beta_\ell \mathbb{E}[\log(X^\ell)] - \mathbb{E}[f(X)],
\end{aligned}$$

where  $s = (1 - z)/(\sum_{\ell \neq j}^p X^\ell)$ . Using  $\beta^j = -\sum_{\ell \neq j}^p \beta_\ell$  (which follows from the log-contrast model constraint on  $\beta$ ) we can simplify this further and get

$$\begin{aligned}
S_f^j(z) &= \beta_j \log(z) + \sum_{\ell \neq j}^p \beta_\ell \mathbb{E}[\log(1 - z)] - \sum_{\ell \neq j}^p \beta_\ell \mathbb{E}[\log(\sum_{k \neq j}^p X^k)] + \sum_{\ell \neq j}^p \beta_\ell \mathbb{E}[\log(X^\ell)] - \mathbb{E}[f(X)] \\
&= \beta_j \log(z) - \beta_j \mathbb{E}[\log(1 - z)] + \beta_j \mathbb{E}[\log(\sum_{k \neq j}^p X^k)] + \sum_{\ell \neq j}^p \beta_\ell \mathbb{E}[\log(X^\ell)] - \mathbb{E}[f(X)] \\
&= \beta_j \log\left(\frac{z}{1 - z}\right) + \beta_j \mathbb{E}[\log(\sum_{k \neq j}^p X^k)] + \sum_{\ell \neq j}^p \beta_\ell \mathbb{E}[\log(X^\ell)] - \sum_{\ell=1}^p \beta_\ell \mathbb{E}[\log(X^\ell)] \\
&= \beta_j \log\left(\frac{z}{1 - z}\right) + c,
\end{aligned}$$

with  $c = \beta_j \mathbb{E}[\log(\sum_{k \neq j}^p X^k)] + \sum_{\ell \neq j}^p \beta_\ell \mathbb{E}[\log(X^\ell)] - \sum_{\ell=1}^p \beta_\ell \mathbb{E}[\log(X^\ell)]$ . Finally, assume  $\beta^j = 0$ , then it holds that

$$c = \sum_{\ell \neq j}^p \beta_\ell \mathbb{E}[\log(X^\ell)] - \sum_{\ell \neq j}^p \beta_\ell \mathbb{E}[\log(X^\ell)] = 0.$$

This completes the proof of Proposition 2.1.  $\square$

## B Proof of Theorem 2.1

*Proof.* We first prove (i). To see this, we apply the triangle inequality to get that

$$|\hat{I}_{\hat{f}_n}^j - I_{f^*}^j| \leq \underbrace{|\hat{I}_{\hat{f}_n}^j - \hat{I}_{f^*}^j|}_{=: A_n} + \underbrace{|\hat{I}_{f^*}^j - I_{f^*}^j|}_{=: B_n}. \quad (\text{C})$$

Next, we consider the two terms  $A_n$  and  $B_n$  separately. We begin with  $A_n$ , by using the definition of the CFI together with (A) from the proof of Proposition 2.1. This leads to

$$\begin{aligned}
A_n &= \left| \frac{1}{n} \sum_{i=1}^n \left( \frac{d}{dc} \hat{f}_n(\psi(X_i, c)|_{c=1}) - \frac{d}{dc} f^*(\psi(X_i, c)|_{c=1}) \right) \right| \\
&= \left| \frac{1}{n} \sum_{i=1}^n \left\langle \nabla \hat{f}_n(X_i) - \nabla f^*(X_i), X_i^j(e_j - X_i) \right\rangle \right| \\
&\leq \frac{1}{n} \sum_{i=1}^n \left| \left\langle \nabla \hat{f}_n(X_i) - \nabla f^*(X_i), X_i^j(e_j - X_i) \right\rangle \right| \\
&\leq \frac{1}{n} \sum_{i=1}^n \|\nabla \hat{f}_n(X_i) - \nabla f^*(X_i)\|_2 \|X_i^j(e_j - X_i)\|_2 \\
&\leq \frac{1}{n} \sum_{i=1}^n \|\nabla \hat{f}_n(X_i) - \nabla f^*(X_i)\|_2,
\end{aligned}$$

where for the last three steps we used the triangle inequality, the Cauchy-Schwartz inequality and that  $\|X_i^j(e_j - X_i)\|_2 \leq 1$  since  $X_i \in \mathbb{S}^{p-1}$ , respectively. By assumption, it therefore holds that  $A_n \rightarrow 0$  in probability as  $n \rightarrow \infty$ . For the  $B_n$  term, observe that using the same bounds it holds that

$$\mathbb{E} \left[ \left( \frac{d}{dc} f^*(\psi(X_i, c)|_{c=1}) \right)^2 \right] = \mathbb{E} \left[ \left( \left\langle \nabla f^*(X_i), X_i^j(e_j - X_i) \right\rangle \right)^2 \right] \leq \mathbb{E} \left[ \|\nabla f^*(X_i)\|_2^2 \right].$$

By assumption that  $\mathbb{E} \left[ \|\nabla f^*(X_i)\|_2^2 \right] < \infty$  this implies we can apply the weak law of large numbers to get for  $n \rightarrow \infty$  that

$$\hat{I}_{f^*}^j = \frac{1}{n} \sum_{i=1}^n \frac{d}{dc} f^*(\psi(X_i, c)|_{c=1}) \xrightarrow{P} \mathbb{E} \left[ \frac{d}{dc} f^*(\psi(X_i, c)|_{c=1}) \right] = I_{f^*}^j.$$

This immediately implies that  $B_n \rightarrow 0$  in probability as  $n \rightarrow \infty$ . Combining the convergence of  $A_n$  and  $B_n$  in (C) completes the proof of (i).

Next, we prove (ii). Fix  $j \in \{1, \dots, p\}$  and  $z \in [0, 1]$  such that  $z/(1-z) \in \text{supp}(X^j / \sum_{\ell \neq j} X^\ell)$ .

By the definition of the perturbation  $\phi_j$  we get that

$$\phi_j(X, z) = s(X^1, \dots, X^{j-1}, \frac{z}{1-z} \sum_{\ell \neq j} X^\ell, X^{j+1}, \dots, X^p) \tag{D}$$

where  $s = (1 - z)/(\sum_{\ell \neq j}^p X^\ell)$ . Next, using the assumption that  $\text{supp}(X) = \{x \in \mathbb{S}^{p-1} \mid x = w/(\sum_j w^j) \text{ with } w \in \text{supp}(X^1) \times \cdots \times \text{supp}(X^p)\}$  and that  $z/(1 - z) \in \text{supp}(X^j/\sum_{\ell \neq j} X^\ell)$  we get that

$$\phi_j(X, z) \in \text{supp}(X^j) \quad (\text{E})$$

almost surely.

By the triangle inequality it holds that

$$|\hat{S}_{\hat{f}_n}^j(z) - S_{f^*}^j(z)| \leq \underbrace{|\hat{S}_{\hat{f}_n}^j(z) - \hat{S}_{f^*}^j(z)|}_{=: C_n} + \underbrace{|\hat{S}_{f^*}^j(z) - S_{f^*}^j(z)|}_{=: D_n}. \quad (\text{F})$$

We now consider the two terms  $C_n$  and  $D_n$  separately. First, we apply the triangle inequality to bound the  $C_n$  term as follows.

$$\begin{aligned} C_n &= \left| \frac{1}{n} \sum_{i=1}^n (\hat{f}_n(\phi_j(X_i, z)) - f^*(\phi_j(X_i, z))) + \frac{1}{n} \sum_{i=1}^n (\hat{f}_n(X_i) - f^*(X_i)) \right| \\ &\leq \frac{1}{n} \sum_{i=1}^n \left| \hat{f}_n(\phi_j(X_i, z)) - f^*(\phi_j(X_i, z)) \right| + \frac{1}{n} \sum_{i=1}^n \left| \hat{f}_n(X_i) - f^*(X_i) \right| \\ &\leq 2 \sup_{x \in \text{supp}(X)} \left| \hat{f}_n(x) - f^*(x) \right|, \end{aligned}$$

where for the last step we used a supremum bound together with (D). Hence, using the assumption that  $\sup_{x \in \text{supp}(X)} |\hat{f}_n(x) - f^*(x)| \xrightarrow{P} 0$  as  $n \rightarrow \infty$ , we get that  $C_n \rightarrow 0$  in probability as  $n \rightarrow \infty$ . Similarly, for the  $D_n$  term we get that

$$\begin{aligned} D_n &= \left| \frac{1}{n} \sum_{i=1}^n f^*(\phi_j(X_i, z)) - \mathbb{E}[f^*(\phi_j(X_i, z))] + \frac{1}{n} \sum_{i=1}^n f^*(X_i) - \mathbb{E}[f^*(X_i)] \right| \\ &\leq \left| \frac{1}{n} \sum_{i=1}^n f^*(\phi_j(X_i, z)) - \mathbb{E}[f^*(\phi_j(X_i, z))] \right| + \left| \frac{1}{n} \sum_{i=1}^n f^*(X_i) - \mathbb{E}[f^*(X_i)] \right|. \end{aligned}$$

Since the  $X_1, \dots, X_n$  and hence  $\phi_j(X_1, z), \dots, \phi_j(X_n, z)$  are i.i.d. and bounded we can apply the weak law of large numbers to get that  $D_n \rightarrow 0$  in probability as  $n \rightarrow \infty$ .

Finally, combining the convergence of  $C_n$  and  $D_n$  with (F) proves (ii) and hence completes the proof of Theorem 2.1.  $\square$

## C Proof of Proposition 2.2

*Proof.* For this proof, we denote by  $\mathbb{S}^{p-1}$  the open instead of the closed simplex.

First, since  $k_W$  is a positive definite kernel (see Section 2.1 in S2 Appendix for a proof), it holds that the RKHS  $\mathcal{H}_{k_W}$  can be expressed as the closure of

$$\mathcal{F} := \left\{ f : \mathbb{S}^{p-1} \times \mathbb{S}^{p-1} \rightarrow \mathbb{R} \mid \exists n \in \mathbb{N}, z_1, \dots, z_n \in \mathbb{S}^{p-1}, \alpha_1, \dots, \alpha_n \in \mathbb{R} : f(\cdot) = \sum_{i=1}^n \alpha_i k_W(z_i, \cdot) \right\}.$$

We now show that any function in  $\mathcal{F}$  has the expression given in the statement of the proposition. Let  $f \in \mathcal{F}$  be arbitrary with the expansion

$$f(\cdot) = \sum_{i=1}^n \alpha_i k_W(z_i, \cdot).$$

Then, for all  $x \in \mathbb{S}^{p-1}$  it holds that

$$\begin{aligned} f(x) &= \sum_{i=1}^n \alpha_i \sum_{j,\ell=1}^p W_{\ell,j} \log\left(\frac{z_i^\ell}{g(z_i)}\right) \log\left(\frac{x^j}{g(x)}\right) \\ &= \sum_{j=1}^p \left( \sum_{\ell=1}^p W_{\ell,j} \sum_{i=1}^n \alpha_i \log\left(\frac{z_i^\ell}{g(z_i)}\right) \right) \log\left(\frac{x^j}{g(x)}\right) \\ &= \sum_{j=1}^p \left( \sum_{\ell=1}^p W_{\ell,j} \tilde{\beta}_\ell \right) \log\left(\frac{x^j}{g(x)}\right) \\ &= \sum_{j=1}^p \left( \sum_{\ell=1}^p W_{\ell,j} \tilde{\beta}_\ell \right) \log(x^j) - \left( \sum_{j,\ell=1}^p W_{\ell,j} \tilde{\beta}_\ell \right) \log(g(x)) \\ &= \sum_{j=1}^p \left( \sum_{\ell=1}^p W_{\ell,j} \tilde{\beta}_\ell \right) \log(x^j) - \left( \sum_{\ell=1}^p \tilde{\beta}_\ell \right) \log(g(x)), \end{aligned} \tag{G}$$

where in the third line we defined  $\tilde{\beta}_\ell := \sum_{i=1}^n \alpha_i \log\left(\frac{z_i^\ell}{g(z_i)}\right)$  and in the last equation we used that  $\sum_{j=1}^p W_{\ell,j} = 1$  for all  $\ell \in \{1, \dots, p\}$  by construction of  $W$ . Furthermore, we get that

$$\sum_{j=1}^p \tilde{\beta}_j = \sum_{i=1}^n \alpha_i \left( \sum_{j=1}^p \log(z_i^j) - p \log(g(z_i)) \right) = \sum_{i=1}^n \alpha_i \left( \sum_{j=1}^p \log(z_i^j) - \sum_{j=1}^p \log(z_i^j) \right) = 0. \tag{H}$$

Now, combining this with (G) and setting  $\beta_j := \sum_{\ell=1}^p W_{\ell,j} \tilde{\beta}_\ell$  implies that

$$f(x) = \beta^\top \log(x),$$

where  $\beta$  does not depend on  $x$ .

It remains to show that  $\beta$  satisfies (i)  $\sum_{j=1}^p \beta_j = 0$  and (ii) for all  $\ell \in \{1, \dots, m\}$  it holds for all  $i, j \in P_\ell$  that  $\beta_i = \beta_j$ . For (i), we can use (H) and directly compute

$$\sum_{j=1}^p \beta_j = \sum_{j=1}^p \sum_{\ell=1}^p W_{\ell,j} \tilde{\beta}_\ell = \sum_{\ell=1}^p \tilde{\beta}_\ell = 0.$$

Finally for (ii), fix  $k \in \{1, \dots, m\}$  and  $i, j \in P_k$ , then it holds that

$$\beta_j = \sum_{\ell=1}^p W_{\ell,j} \tilde{\beta}_\ell = \sum_{\ell=1}^p \sum_{r=1}^m \frac{1}{|P_r|} \mathbb{1}_{\{\ell,j \in P_r\}} \tilde{\beta}_\ell = \sum_{\ell=1}^p \frac{1}{|P_k|} \tilde{\beta}_\ell = \sum_{\ell=1}^p \sum_{r=1}^m \frac{1}{|P_r|} \mathbb{1}_{\{\ell,i \in P_r\}} \tilde{\beta}_\ell = \sum_{\ell=1}^p W_{\ell,i} \tilde{\beta}_\ell = \beta_i.$$

This completes the proof of Proposition 2.2. □
