# Supplementary material for: Supervised learning and model analysis with compositional data
Source: PubMed Central journal article supplement (PMC10343141; doi:10.1371/journal.pcbi.1011240), 2023-06-30
Supplement: pcbi.1011240.s007.pdf [file pcbi.1011240.s007.pdf]

## S7 Appendix: List of kernels implemented in KernelBiome

### A List of unweighted kernels

In this section we summarize the all kernels implemented in `KernelBiome` and visualize the metrics and kernels via heatmaps when  $p = 3$ . The reference points are the neutral point  $u = (\frac{1}{3}, \frac{1}{3}, \frac{1}{3})$ , a vertex  $v = (1, 0, 0)$ , a midpoint on a boundary  $m = (\frac{1}{2}, \frac{1}{2}, 0)$ , and an interior point  $z = (\frac{1}{4}, \frac{1}{4}, \frac{1}{2})$  of the simplex. For kernels we omit the neutral point, since  $k(x, u) = 0$  for any  $x \in \mathbb{S}^2$ , as we centered our kernels at  $u$ .

#### Linear metric & kernel

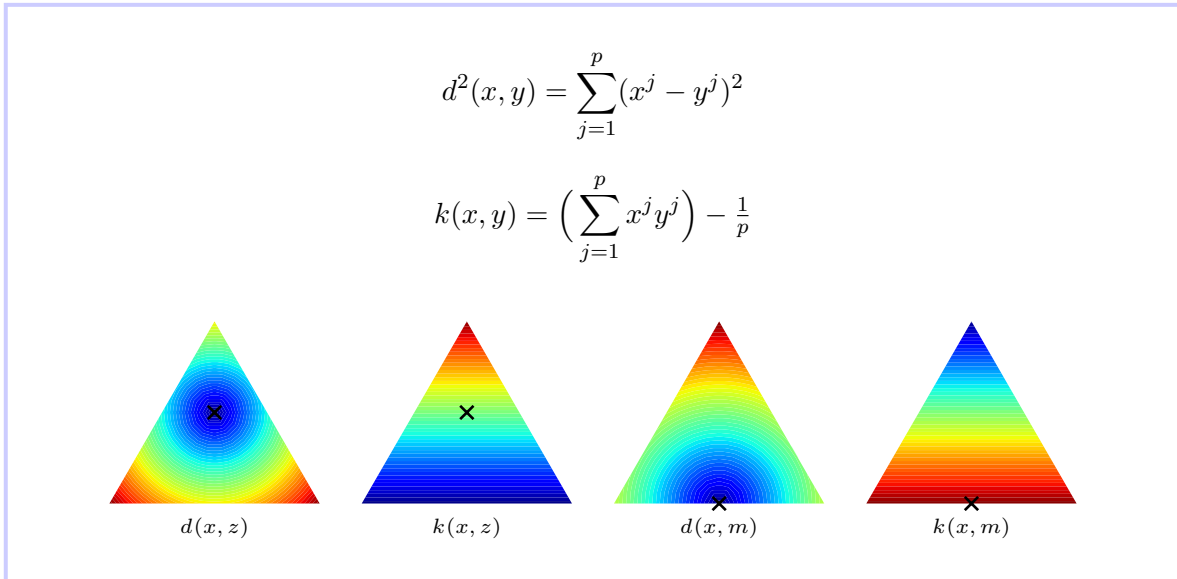

## RBF metric & kernel

$$d^2(x, y) = 2 - 2 \exp\left(-\sum_{j=1}^p \frac{(x^j - y^j)^2}{2\sigma^2}\right)$$

$$k(x, y) = \exp\left(-\sum_{j=1}^p \frac{(x^j - y^j)^2}{2\sigma^2}\right)$$

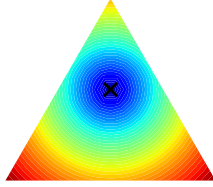

$d_{\sigma=\frac{1}{\sqrt{2}}}(x, z)$

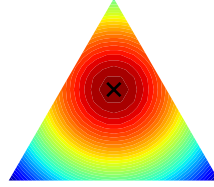

$k_{\sigma=\frac{1}{\sqrt{2}}}(x, z)$

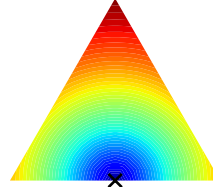

$d_{\sigma=\frac{1}{\sqrt{2}}}(x, m)$

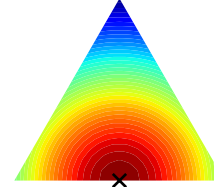

$k_{\sigma=\frac{1}{\sqrt{2}}}(x, m)$

## Generalized-JS metric & kernel ( $a < \infty, b \in [0.5, a)$ )

$$d^2(x, y) = \frac{ab}{a-b} \sum_{j=1}^p \frac{2^{\frac{1}{b}} \left[ (x^j)^a + (y^j)^a \right]^{\frac{1}{a}} - 2^{\frac{1}{a}} \left[ (x^j)^b + (y^j)^b \right]^{\frac{1}{b}}}{2^{\frac{1}{a} + \frac{1}{b}}}$$

$$k(x, y) = -\frac{ab}{a-b} \cdot 2^{-(1+\frac{1}{a}+\frac{1}{b})} \sum_{j=1}^p \left\{ 2^{\frac{1}{b}} \left( \left[ (x^j)^a + (y^j)^a \right]^{\frac{1}{a}} - \left[ (x^j)^a + \left(\frac{1}{p}\right)^a \right]^{\frac{1}{a}} \right) \right. \\ \left. - \left[ \left(\frac{1}{p}\right)^a + (y^j)^a \right]^{\frac{1}{a}} \right) - 2^{\frac{1}{a}} \left( \left[ (x^j)^b + (y^j)^b \right]^{\frac{1}{b}} - \left[ (x^j)^b + \left(\frac{1}{p}\right)^b \right]^{\frac{1}{b}} \right) \right. \\ \left. - \left[ \left(\frac{1}{p}\right)^b + (y^j)^b \right]^{\frac{1}{b}} \right) \right\}$$

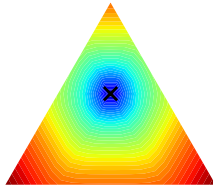

$d_{a=10, b=1}(x, z)$

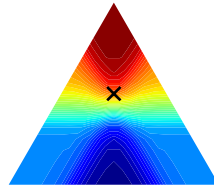

$k_{a=10, b=1}(x, z)$

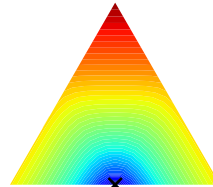

$d_{a=10, b=1}(x, z)$

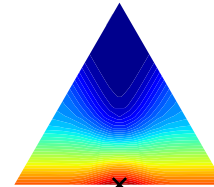

$k_{a=10, b=1}(x, z)$

**Generalized-JS metric & kernel ( $a \rightarrow \infty, b < \infty$ )**

$$d^2(x, y) = \sum_{j=1}^p b \left\{ 2^{\frac{1}{b}} \cdot \max\{x^j, y^j\} - \left[ (x^j)^b + (y^j)^b \right]^{\frac{1}{b}} \right\}$$

$$k(x, y) = -\frac{b}{2} \sum_{j=1}^p \left\{ 2^{\frac{1}{b}} \left( \max\{x^j, y^j\} - \max\{x^j, \frac{1}{p}\} - \max\{y^j, \frac{1}{p}\} \right) \right. \\ \left. - \left[ (x^j)^b + (y^j)^b \right]^{\frac{1}{b}} + \left[ (x^j)^b + \left(\frac{1}{p}\right)^b \right]^{\frac{1}{b}} + \left[ (y^j)^b + \left(\frac{1}{p}\right)^b \right]^{\frac{1}{b}} \right\}$$

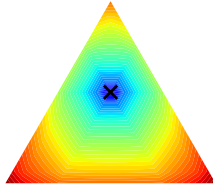

$d_{a=\infty, b=0.5}(x, z)$

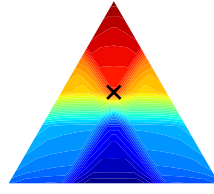

$k_{a=\infty, b=0.5}(x, z)$

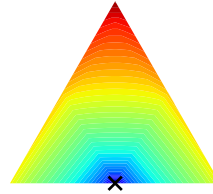

$d_{a=\infty, b=0.5}(x, m)$

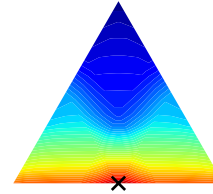

$k_{a=\infty, b=0.5}(x, m)$

**Generalized-JS metric & kernel ( $a < \infty, b \rightarrow a$ )**

$$d^2(x, y) = \sum_{j=1}^p \left[ \frac{(x^j)^b + (y^j)^b}{2} \right]^{\frac{1}{b}} \cdot \left[ \frac{(x^j)^b}{(x^j)^b + (y^j)^b} \cdot \log \frac{2(x^j)^b}{(x^j)^b + (y^j)^b} + \frac{(y^j)^b}{(x^j)^b + (y^j)^b} \cdot \log \frac{2(y^j)^b}{(x^j)^b + (y^j)^b} \right]$$

$$k(x, y) = -\frac{1}{2^{\frac{1}{b}+1}} \sum_{j=1}^p \left\{ \left[ (x^j)^b + (y^j)^b \right]^{\frac{1}{b}-1} \cdot \left( (x^j)^b \cdot \log [2(x^j)^b] + (y^j)^b \log [2(y^j)^b] - \left[ (x^j)^b + (y^j)^b \right] \cdot \log \left[ (x^j)^b + (y^j)^b \right] \right) - \left[ (x^j)^b + \frac{1}{p^b} \right]^{\frac{1}{b}-1} \cdot \left( - \left[ (x^j)^b + \left( \frac{1}{p^b} \right) \right] \cdot \log \left[ (x^j)^b + \frac{1}{p^b} \right] + (x^j)^b \cdot \log [2(x^j)^b] + \frac{1}{p^b} \cdot \log \left[ \frac{2}{p^b} \right] \right) - \left[ (y^j)^b + \frac{1}{p^b} \right]^{\frac{1}{b}-1} \cdot \left( - \left[ (y^j)^b + \left( \frac{1}{p^b} \right) \right] \cdot \log \left[ (y^j)^b + \frac{1}{p^b} \right] + (y^j)^b \cdot \log [2(y^j)^b] + \frac{1}{p^b} \cdot \log \left[ \frac{2}{p^b} \right] \right) \right\}$$

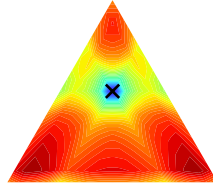

$d_{a=b=10}(x, z)$

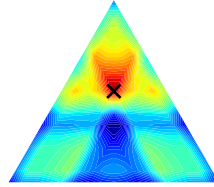

$k_{a=b=10}(x, z)$

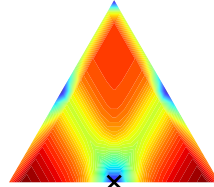

$d_{a=b=10}(x, m)$

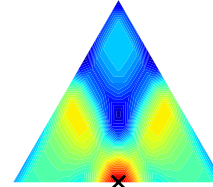

$k_{a=b=10}(x, m)$

### Generalized-JS metric & kernel ( $a = b \rightarrow \infty$ )

$$d^2(x, y) = \sum_{j=1}^p \max\{x^j, y^j\} \cdot \left[ \log(2) \mathbb{1}\{x^j \neq y^j\} \right]$$

$$k(x, y) = -\frac{\log(2)}{2} \cdot \sum_{j=1}^p \left\{ \max\{x^j, y^j\} \cdot \mathbb{1}\{x^j \neq y^j\} \right. \\ \left. - \max\{x^j, \frac{1}{p}\} \cdot \mathbb{1}\{x^j \neq \frac{1}{p}\} - \max\{y^j, \frac{1}{p}\} \cdot \mathbb{1}\{y^j \neq \frac{1}{p}\} \right\}$$

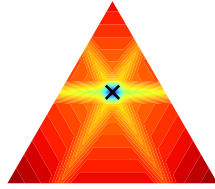

$d_{a=b=\infty}(x, z)$

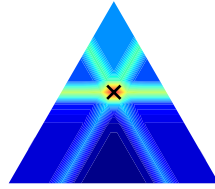

$k_{a=b=\infty}(x, z)$

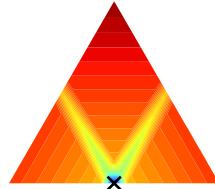

$d_{a=b=\infty}(x, m)$

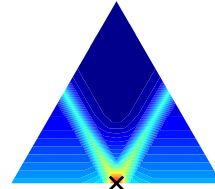

$k_{a=b=\infty}(x, m)$

### Special Case: Hellinger - Generalized-JS metric & kernel ( $a = 1, b = \frac{1}{2}$ )

$$d^2(x, y) = \frac{\sqrt{2}}{2} \sum_{j=1}^p (\sqrt{x^j} - \sqrt{y^j})^2$$

$$k(x, y) = \frac{\sqrt{2}}{4} + \frac{\sqrt{2}}{4} \sum_{j=1}^p \left\{ \sqrt{x^j y^j} - \frac{\sqrt{x^j} + \sqrt{y^j}}{\sqrt{p}} \right\}$$

This corresponds to  $\frac{\sqrt{2}}{2}$  times the **Hellinger** metric and kernel.

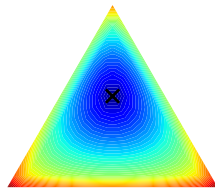

$d_{a=1,b=0.5}(x, z)$

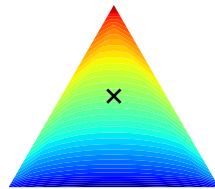

$k_{a=1,b=0.5}(x, z)$

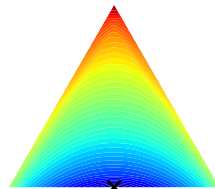

$d_{a=1,b=0.5}(x, m)$

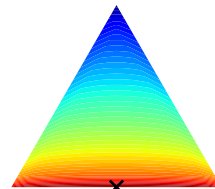

$k_{a=1,b=0.5}(x, m)$

**Special Case: Jenson-Shannon - Generalized-JS metric & kernel ( $a = 1, b = 1$ )**

$$d^2(x, y) = \frac{1}{2} \sum_{j=1}^p x^j \log \frac{2x^j}{x^j + y^j} + y^j \log \frac{2y^j}{x^j + y^j}$$

$$k(x, y) = -\frac{1}{4} \sum_{j=1}^p \left\{ x^j \log \frac{x^j + \frac{1}{p}}{x^j + y^j} + y^j \log \frac{y^j + \frac{1}{p}}{x^j + y^j} - \frac{1}{p} \log \frac{4}{p^2(x^j + \frac{1}{p})(y^j + \frac{1}{p})} \right\}$$

This corresponds to the **Jenson-Shannon** metric and kernel.

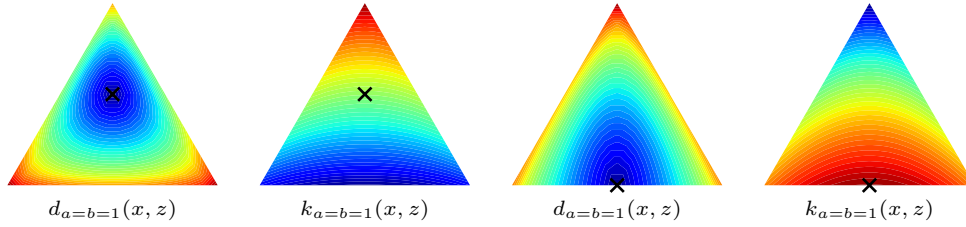

**Special Case: Total Variation - Generalized-JS metric & kernel ( $a = \infty, b = 1$ )**

$$d^2(x, y) = \sum_{j=1}^p |x^j - y^j|$$

$$k(x, y) = -\frac{1}{2} \sum_{j=1}^p \left\{ |x^j - y^j| - |x^j - \frac{1}{p}| - |y^j - \frac{1}{p}| \right\}$$

This corresponds to 2 times the **total variation** metric and kernel.

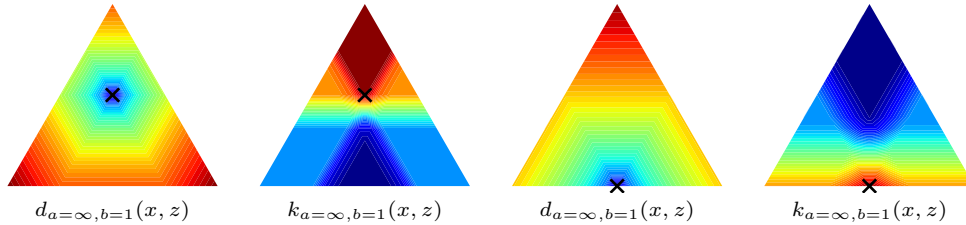

**Hilbertian metric & kernel ( $a < \infty, b > -\infty$ )**

$$d^2(x, y) = \sum_{j=1}^p \frac{2^{\frac{1}{b}} \left[ (x^j)^a + (y^j)^a \right]^{\frac{1}{a}} - 2^{\frac{1}{a}} \left[ (x^j)^b + (y^j)^b \right]^{\frac{1}{b}}}{2^{\frac{1}{a}} - 2^{\frac{1}{b}}}$$

$$k(x, y) = -\frac{1}{2(2^{\frac{1}{a}} - 2^{\frac{1}{b}})} \sum_{j=1}^p \left\{ 2^{\frac{1}{b}} \left( \left[ (x^j)^a + (y^j)^a \right]^{\frac{1}{a}} - \left[ (x^j)^a + \left(\frac{1}{p}\right)^a \right]^{\frac{1}{a}} \right. \right. \\ \left. \left. - \left[ (y^j)^a + \left(\frac{1}{p}\right)^a \right]^{\frac{1}{a}} \right) - 2^{\frac{1}{a}} \left( \left[ (x^j)^b + (y^j)^b \right]^{\frac{1}{b}} - \left[ (x^j)^b + \left(\frac{1}{p}\right)^b \right]^{\frac{1}{b}} \right) \right. \\ \left. - \left[ (y^j)^b + \left(\frac{1}{p}\right)^b \right]^{\frac{1}{b}} \right\}$$

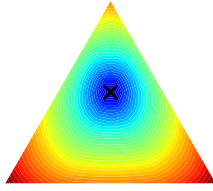

$d_{a=10, b=-1}(x, z)$

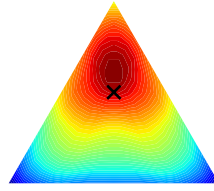

$k_{a=10, b=-1}(x, z)$

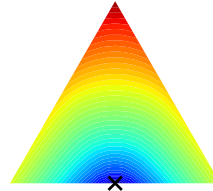

$d_{a=10, b=-1}(x, m)$

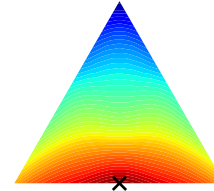

$k_{a=10, b=-1}(x, m)$

**Hilbertian metric & kernel ( $a \rightarrow \infty, b > -\infty$ )**

$$d^2(x, y) = \sum_{j=1}^p b \left\{ 2^{\frac{1}{b}} \cdot \max\{x^j, y^j\} - \left[ (x^j)^b + (y^j)^b \right]^{\frac{1}{b}} \right\}$$

$$k(x, y) = -\frac{1}{2(1 - 2^{\frac{1}{b}})} \sum_{j=1}^p \left\{ 2^{\frac{1}{b}} \left( \max\{x^j, y^j\} - \max\{x^j, \frac{1}{p}\} - \max\{y^j, \frac{1}{p}\} \right) \right. \\ \left. - \left[ (x^j)^b + (y^j)^b \right]^{\frac{1}{b}} + \left[ (x^j)^b + \left(\frac{1}{p}\right)^b \right]^{\frac{1}{b}} + \left[ (y^j)^b + \left(\frac{1}{p}\right)^b \right]^{\frac{1}{b}} \right\}$$

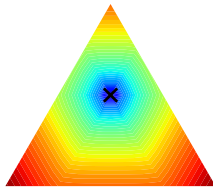

$d_{a=\infty, b=-10}(x, z)$

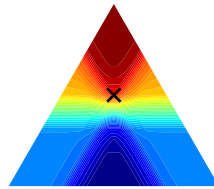

$k_{a=\infty, b=-10}(x, z)$

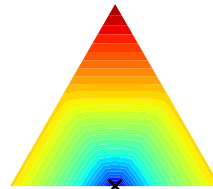

$d_{a=\infty, b=-10}(x, m)$

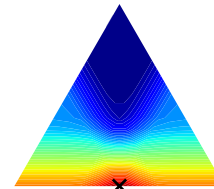

$k_{a=\infty, b=-10}(x, m)$

### Hilbertian metric & kernel ( $a < \infty, b \rightarrow -\infty$ )

$$d^2(x, y) = \frac{1}{2^{\frac{1}{a}} - 1} \sum_{j=1}^p \left\{ \left[ (x^j)^a + (y^j)^a \right]^{\frac{1}{a}} - 2^{\frac{1}{a}} \cdot \min\{x^j, y^j\} \right\}$$

$$k(x, y) = -\frac{1}{2(2^{\frac{1}{a}} - 1)} \sum_{j=1}^p \left\{ \left[ (x^j)^a + (y^j)^a \right]^{\frac{1}{a}} - \left[ (x^j)^a + \left(\frac{1}{p}\right)^a \right]^{\frac{1}{a}} - \left[ (y^j)^a + \left(\frac{1}{p}\right)^a \right]^{\frac{1}{a}} - 2^{\frac{1}{a}} \left[ \min\{x^j, y^j\} - \min\{x^j, \frac{1}{p}\} - \min\{y^j, \frac{1}{p}\} \right] \right\}$$

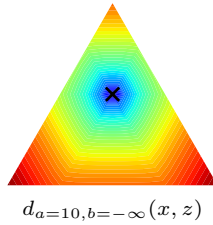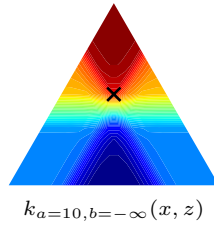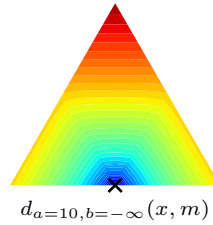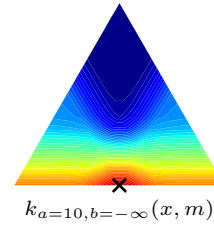

### Special Case: Chi-square - Hilbertian metric & kernel ( $a = 1, b = -1$ )

$$d^2(x, y) = \frac{1}{3} \sum_{j=1}^p \frac{(x^j - y^j)^2}{x^j + y^j}$$

$$k(x, y) = -\frac{1}{6} \sum_{j=1}^p \left\{ \frac{(x^j - y^j)^2}{x^j + y^j} - \frac{(x^j - \frac{1}{p})^2}{x^j + \frac{1}{p}} - \frac{(y^j - \frac{1}{p})^2}{y^j + \frac{1}{p}} \right\}$$

This corresponds to  $\frac{1}{3}$  of the **chi-square** metric and kernel.

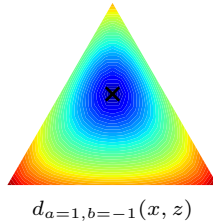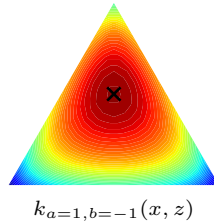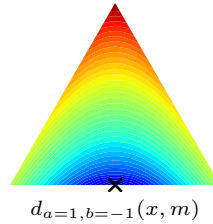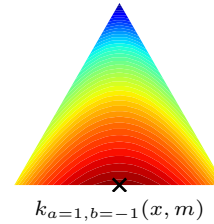



**Special Case: Total Variation - Hilbertian metric & kernel ( $a = 1, b = -\infty$ )**

$$d^2(x, y) = \frac{1}{2} \sum_{j=1}^p |x^j - y^j|$$

$$k(x, y) = -\frac{1}{4} \sum_{j=1}^p \left\{ |x^j - y^j| - \left| x^j - \frac{1}{p} \right| - \left| y^j - \frac{1}{p} \right| \right\}$$

This corresponds to the **total variation** metric and kernel.

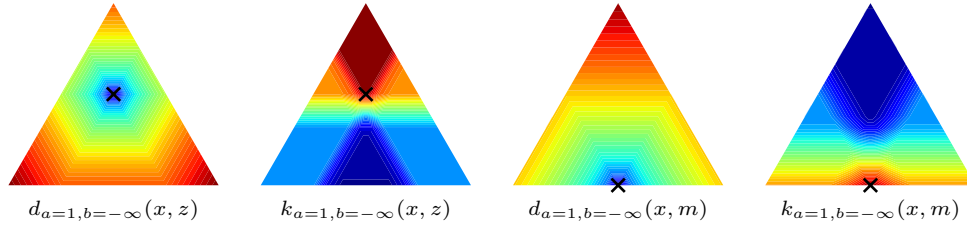

**Aitchison metric & kernel**

$$d^2(x, y) = \sum_{j=1}^p \left( \log \frac{x^j + c}{g(x + c)} - \log \frac{y^j + c}{g(y + c)} \right)^2$$

$$k(x, y) = \sum_{j=1}^p \log \frac{x^j + c}{g(x + c)} \log \frac{y^j + c}{g(y + c)}$$

where  $g(x) = \sqrt[p]{\prod_{j=1}^p x^j}$  is the geometric mean of  $x$ .

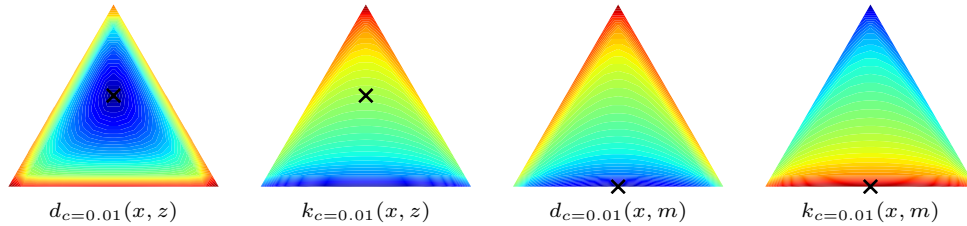

### Aitchison-RBF metric & kernel

$$d^2(x, y) = 2 - 2 \exp \left( - \frac{1}{2\sigma^2} \sum_{j=1}^p \left[ \log \frac{x^j + c}{g(x+c)} - \log \frac{y^j + c}{g(y+c)} \right]^2 \right)$$

$$k(x, y) = \exp \left( - \frac{1}{2\sigma^2} \sum_{j=1}^p \left[ \log \frac{x^j + c}{g(x+c)} - \log \frac{y^j + c}{g(y+c)} \right]^2 \right)$$

where  $g(x) = \sqrt[p]{\prod_{j=1}^p x^j}$  is the geometric mean of  $x$ .

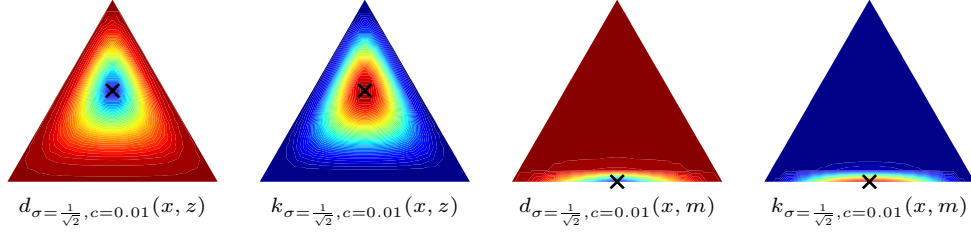

### Heat diffusion metric & kernel

$$d^2(x, y) = 2 \cdot (4\pi t)^{-\frac{p}{2}} \cdot \left[ 1 - \exp \left( - \frac{1}{t} \arccos^2 \left( \sum_{j=1}^p \sqrt{x^j y^j} \right) \right) \right]$$

$$k(x, y) = (4\pi t)^{-p/2} \cdot \exp \left( - \frac{1}{t} \arccos^2 \left( \sum_{j=1}^p \sqrt{x^j y^j} \right) \right)$$

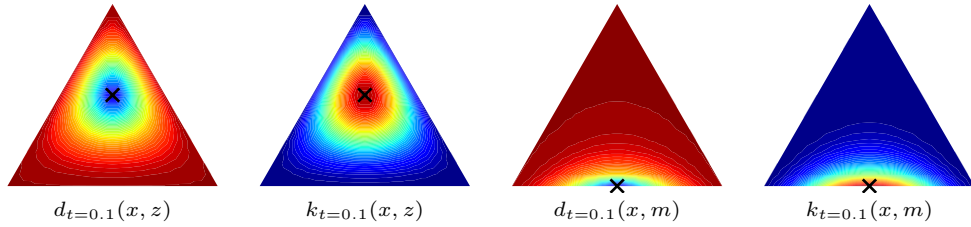

## B List of weighted kernels

As discussed in S2 Appendix, all kernels can also be modified to include a weight matrix  $W \in \mathbb{R}^{p \times p}$ . Below, we list the explicit forms of all weighted kernels as they are implemented in `KernelBiome` package. As before, let  $g(x) = \sqrt[p]{\prod_{j=1}^p x^j}$  be the geometric mean of  $x$ .

**Linear kernel**

$$k(x, y) = \sum_{j, \ell=1}^p W_{j, \ell} \left( x^j y^\ell - \frac{x^j}{p} - \frac{y^\ell}{p} + \frac{1}{p^2} \right)$$

**RBF kernel**

$$k(x, y) = \exp \left( - \sum_{j, \ell=1}^p \frac{W_{j, \ell} (x^j - y^\ell)^2}{2\sigma^2} \right)$$

**Generalized-JS kernel** ( $a < \infty, b \in [0.5, a]$ )

$$\begin{aligned} k(x, y) = & -\frac{ab}{a-b} \cdot 2^{-(1+\frac{1}{a}+\frac{1}{b})} \sum_{j, \ell=1}^p W_{j, \ell} \left\{ 2^{\frac{1}{b}} \left( \left[ (x^j)^a + (y^\ell)^a \right]^{\frac{1}{a}} - \left[ (x^j)^a + \left( \frac{1}{p} \right)^a \right]^{\frac{1}{a}} \right. \right. \\ & - \left. \left[ \left( \frac{1}{p} \right)^a + (y^\ell)^a \right]^{\frac{1}{a}} \right) - 2^{\frac{1}{a}} \left( \left[ (x^j)^b + (y^\ell)^b \right]^{\frac{1}{b}} - \left[ (x^j)^b + \left( \frac{1}{p} \right)^b \right]^{\frac{1}{b}} \right) \\ & \left. - \left[ \left( \frac{1}{p} \right)^b + (y^\ell)^b \right]^{\frac{1}{b}} \right\} \end{aligned}$$

**Generalized-JS kernel** ( $a \rightarrow \infty, b < \infty$ )

$$\begin{aligned} k(x, y) = & -\frac{b}{2} \sum_{j, \ell=1}^p W_{j, \ell} \left\{ 2^{\frac{1}{b}} \left( \max\{x^j, y^\ell\} - \max\{x^j, \frac{1}{p}\} - \max\{y^\ell, \frac{1}{p}\} \right) \right. \\ & \left. - \left[ (x^j)^b + (y^\ell)^b \right]^{\frac{1}{b}} + \left[ (x^j)^b + \left( \frac{1}{p} \right)^b \right]^{\frac{1}{b}} + \left[ (y^\ell)^b + \left( \frac{1}{p} \right)^b \right]^{\frac{1}{b}} \right\} \end{aligned}$$

**Generalized-JS kernel** ( $a < \infty, b \rightarrow a$ )

$$\begin{aligned} k(x, y) = & -\frac{1}{2^{\frac{1}{b}+1}} \sum_{j, \ell=1}^p W_{j, \ell} \left\{ \left[ (x^j)^b + (y^\ell)^b \right]^{\frac{1}{b}-1} \cdot \left( (x^j)^b \cdot \log \left[ 2(x^j)^b \right] + (y^\ell)^b \log \left[ 2(y^\ell)^b \right] \right. \right. \\ & - \left. \left[ (x^j)^b + (y^\ell)^b \right] \cdot \log \left[ (x^j)^b + (y^\ell)^b \right] \right) \\ & - \left[ (x^j)^b + \frac{1}{p^b} \right]^{\frac{1}{b}-1} \cdot \left( - \left[ (x^j)^b + \left( \frac{1}{p^b} \right) \right] \cdot \log \left[ (x^j)^b + \frac{1}{p^b} \right] \right. \\ & \left. + (x^j)^b \cdot \log \left[ 2(x^j)^b \right] + \frac{1}{p^b} \cdot \log \left[ \frac{2}{p^b} \right] \right) \\ & - \left[ (y^\ell)^b + \frac{1}{p^b} \right]^{\frac{1}{b}-1} \cdot \left( - \left[ (y^\ell)^b + \left( \frac{1}{p^b} \right) \right] \cdot \log \left[ (y^\ell)^b + \frac{1}{p^b} \right] \right. \\ & \left. + (y^\ell)^b \cdot \log \left[ 2(y^\ell)^b \right] + \frac{1}{p^b} \cdot \log \left[ \frac{2}{p^b} \right] \right) \left. \right\} \end{aligned}$$

**Generalized-JS kernel** ( $a = b \rightarrow \infty$ )

$$k(x, y) = -\frac{\log(2)}{2} \cdot \sum_{j,\ell=1}^p W_{j,\ell} \left\{ \max\{x^j, y^\ell\} \cdot \mathbb{1}\{x^j \neq y^\ell\} \right. \\ \left. - \max\{x^j, \frac{1}{p}\} \cdot \mathbb{1}\{x^j \neq \frac{1}{p}\} - \max\{y^\ell, \frac{1}{p}\} \cdot \mathbb{1}\{y^\ell \neq \frac{1}{p}\} \right\}$$

**Hilbertian kernel** ( $a < \infty, b > -\infty$ )

$$k(x, y) = -\frac{1}{2(2^{\frac{1}{a}} - 2^{\frac{1}{b}})} \sum_{j,\ell=1}^p W_{j,\ell} \left\{ 2^{\frac{1}{b}} \left( [(x^j)^a + (y^\ell)^a]^{\frac{1}{a}} - [(x^j)^a + (\frac{1}{p})^a]^{\frac{1}{a}} \right. \right. \\ \left. - [(y^\ell)^a + (\frac{1}{p})^a]^{\frac{1}{a}} \right) - 2^{\frac{1}{a}} \left( [(x^j)^b + (y^\ell)^b]^{\frac{1}{b}} - [(x^j)^b + (\frac{1}{p})^b]^{\frac{1}{b}} \right. \\ \left. - [(y^\ell)^b + (\frac{1}{p})^b]^{\frac{1}{b}} \right) \right\}$$

**Hilbertian kernel** ( $a \rightarrow \infty, b > -\infty$ )

$$k(x, y) = -\frac{1}{2(1 - 2^{\frac{1}{b}})} \sum_{j,\ell=1}^p W_{j,\ell} \left\{ 2^{\frac{1}{b}} \left( \max\{x^j, y^\ell\} - \max\{x^j, \frac{1}{p}\} - \max\{y^\ell, \frac{1}{p}\} \right) \right. \\ \left. - \left[ (x^j)^b + (y^\ell)^b \right]^{\frac{1}{b}} + \left[ (x^j)^b + (\frac{1}{p})^b \right]^{\frac{1}{b}} + \left[ (y^\ell)^b + (\frac{1}{p})^b \right]^{\frac{1}{b}} \right\}$$

**Hilbertian kernel** ( $a < \infty, b \rightarrow -\infty$ )

$$k(x, y) = -\frac{1}{2(2^{\frac{1}{a}} - 1)} \sum_{j,\ell=1}^p W_{j,\ell} \left\{ \left[ (x^j)^a + (y^\ell)^a \right]^{\frac{1}{a}} - \left[ (x^j)^a + (\frac{1}{p})^a \right]^{\frac{1}{a}} - \left[ (y^\ell)^a + (\frac{1}{p})^a \right]^{\frac{1}{a}} \right. \\ \left. - 2^{\frac{1}{a}} \left[ \min\{x^j, y^\ell\} - \min\{x^j, \frac{1}{p}\} - \min\{y^\ell, \frac{1}{p}\} \right] \right\}$$

**Aitchison kernel**

$$k(x, y) = \sum_{j,\ell=1}^p W_{j,\ell} \log \frac{x^j + c}{g(x + c)} \log \frac{y^\ell + c}{g(y + c)}$$

**Aitchison RBF kernel**

$$k(x, y) = \exp \left( -\frac{1}{2\sigma^2} \sum_{j,\ell=1}^p W_{j,\ell} \left[ \log \frac{x^j + c}{g(x + c)} - \log \frac{y^\ell + c}{g(y + c)} \right]^2 \right)$$

## Heat diffusion kernel

$$k(x, y) = (4\pi t)^{-p/2} \cdot \exp\left(-\frac{1}{t} \arccos^2\left(\sum_{j,\ell=1}^p W_{j,\ell} \sqrt{x^j y^\ell}\right)\right)$$
